# Supplementary material for: Validated Smartphone-Based Apps for Ear and Hearing Assessments: A Review
Source: PubMed Central journal article supplement (PMC5454564; doi:10.2196/rehab.6074), 2016-12-23
Supplement: rehab_v3i2e13_app2.pdf [file rehab_v3i2e13_app2.pdf]

**Appendix 2:** Summary of apps identified on Google Play and AppStore reviews.

| Name (Developer)                                                               | Intended age group | Intended tester                   | Operating system | Recommended transducer                                            | Cost (\$US) <sup>c</sup> | Validated in peer-reviewed literature |
|--------------------------------------------------------------------------------|--------------------|-----------------------------------|------------------|-------------------------------------------------------------------|--------------------------|---------------------------------------|
| <b>Audiometry apps</b>                                                         |                    |                                   |                  |                                                                   |                          |                                       |
| Hearing test (Audiology-online)                                                | Adults             | Self-administered                 | Android          | None specified                                                    | Free                     | N                                     |
| Audiometry made easy (Reece Stevens)                                           | Adults             | Self-administered                 | Android          | None specified                                                    | Free                     | N                                     |
| Hearing Game (Mobile medico)                                                   | Children           | Administered by parent/carer      | Android          | Phone speakers, insert headphone                                  | \$2.60                   | N                                     |
| Audio-test (leo4google)                                                        | Adults             | Self-administered                 | Android          | None specified                                                    | Free                     | N                                     |
| Audiometer for Android (Sandroid studio)                                       | Adults             | Self-administered or professional | Android          | None specified                                                    | Free                     | N                                     |
| Hearing Analyzer - for Audiophile, Hearing Analyzer for Audiophile Lite (TOON) | Adults             | Self-administered                 | iOS              | Apple earbuds                                                     | \$2.99                   | N                                     |
| uHear (Unitron Hearing)                                                        | Adults             | Self-administered                 | iOS              | None specified                                                    | Free                     | Y                                     |
| Ear Werx (Brad May)                                                            | Adults             | Self-administered                 | iOS              | Apple earbuds with microphone                                     | Free/<br>\$0.99          | N                                     |
| Ear Werx Premium edition (Brad May)                                            | Adults             | Self-administered                 | iOS              | Apple earbuds with microphone                                     | \$0.99                   | N                                     |
| Audicus hearing test lite (Audicus)                                            | Adults             | Self-administered                 | iOS              | None specified                                                    | Free                     | N                                     |
| Audiogram Mobile (Vincenzo Cocciolo)                                           | Adults             | Professional                      | iOS              | Any good quality headphones, app has inbuilt calibration function | \$28.99                  | N                                     |
| Audiometry game (Wevosys Franke)                                               | Children           | Self-administered                 | iOS              | Apple earbuds                                                     | Free                     | N                                     |
| Hearing Check (Bxtel)                                                          | Adults             | Self-administered                 | iOS              | None specified                                                    | Free                     | N                                     |
| Hearing exam (Hyunmin Park)                                                    | Adults             | Self-administered                 | iOS              | None specified                                                    | Free                     | N                                     |
| Hearing test #1 (Aveos)                                                        | Adults             | Self-administered                 | iOS              | None specified                                                    | \$1.80                   | N                                     |

| Name (Developer)                                                                                                                                                                                          | Intended age group | Intended tester   | Operating system | Recommended transducer                                 | Cost (\$US) <sup>c</sup>                                                                                                                                                                         | Validated in peer-reviewed literature |
|-----------------------------------------------------------------------------------------------------------------------------------------------------------------------------------------------------------|--------------------|-------------------|------------------|--------------------------------------------------------|--------------------------------------------------------------------------------------------------------------------------------------------------------------------------------------------------|---------------------------------------|
| <b>Audiometry apps</b>                                                                                                                                                                                    |                    |                   |                  |                                                        |                                                                                                                                                                                                  |                                       |
| Hearing test pro free (Up with apps)                                                                                                                                                                      | Adults             | Self-administered | iOS              | None specified                                         | Free                                                                                                                                                                                             | N                                     |
| ShoeBOX Audiometry, ShoeBox Audiometry Pro (Clearwater Clinical)                                                                                                                                          | All ages           | Professional      | iOS              | TDH-39, EAR 3A insert headphones, B-71 bone transducer | Humanitarian price: \$2000<br>Standard version price: \$3100<br>Professional version price: \$4100<br>(includes: headphones, software, first year's calibration. Excludes the price of the iPad) | Y                                     |
| iAudiometer Lite, iAudiometer CS Lite, iAudiometer A, iAudiometer PRO, iAudiometer BAC, iAudiometer CS, iAudiometer S, iAudiometer TEP, iAudiometer PED, iAudiometer B, iAudiometer Psst! (MelMedtronics) | All ages           | Professional      | iOS              | TDH-39, TDH-49, DD45, ER-3, ER-5 and B71               | Varied                                                                                                                                                                                           | N                                     |
| AudCAL, AudCAL HD, AudCAL mini (Jorge Alberto Rey Martinez)                                                                                                                                               | Adults             | Professional      | iOS              | None specified                                         | Free                                                                                                                                                                                             | Y                                     |
| Mimi hearing test (Mimi hearing technologies)                                                                                                                                                             | Adults             | Self-administered | iOS              | Apple earbuds/pods                                     | Free                                                                                                                                                                                             | N                                     |
| uHearingTest (University of California)                                                                                                                                                                   | Adults             | Self-administered | iOS              | iPhone 5 Headphones                                    | Free                                                                                                                                                                                             | N                                     |
| Eartone Manut (Utoomprurkporn)                                                                                                                                                                            | Adults             | Self-administered | iOS              | None specified                                         | Free                                                                                                                                                                                             | N                                     |
| EarTrumpet (Praxis Biosciences)                                                                                                                                                                           | Adults             | Self-administered | Android and iOS  | Apple earphones with microphone                        | \$3.99                                                                                                                                                                                           | Y                                     |

| Name (Developer)                                             | Intended age group | Intended tester   | Operating system | Recommended transducer | Cost (\$US) <sup>c</sup>                 | Validated in peer-reviewed literature |
|--------------------------------------------------------------|--------------------|-------------------|------------------|------------------------|------------------------------------------|---------------------------------------|
| <b>Audiometry apps</b>                                       |                    |                   |                  |                        |                                          |                                       |
| Sound check, Listen Carefully (Starkey Hearing Technologies) | Adults             | Self-administered | Android and iOS  | None specified         | Free                                     | N                                     |
| MFA hearing test (Unlimiter Inc)                             | Adults             | Self-administered | Android iOS      | None specified         | Free                                     | N                                     |
| u sound (newbrick SA)                                        | Adults             | Self-administered | Android iOS      | None specified         | 1 year \$30, 5 years \$105, 3 years \$75 | N                                     |
| <b>Otoscopy apps</b>                                         |                    |                   |                  |                        |                                          |                                       |
| CellScope (CellScope)                                        | All ages           | Professional      | iOS              | N/A                    | Free \$79 for iPhone attachment          | Y                                     |
| TM-Rotator (Rockodile)                                       | All ages           | Professional      | iOS              | N/A                    | Free                                     | N                                     |
| ClearSCOPE (Clearwater Clinical Limited)                     | All ages           | Professional      | iOS              | N/A                    | Free                                     | N                                     |
| OtoscopeApp (Austin Rose)                                    | All ages           | Professional      | iOS              | N/A                    | Free                                     | N                                     |
| <sup>c</sup> Subject to change                               |                    |                   |                  |                        |                                          |                                       |
