# Supplementary material for: Validated Smartphone-Based Apps for Ear and Hearing Assessments: A Review
Source: PubMed Central journal article supplement (PMC5454564; doi:10.2196/rehab.6074), 2016-12-23
Supplement: rehab_v3i2e13_app4.pdf [file rehab_v3i2e13_app4.pdf]

| Study author (Year)       | Risk of bias                                         |            |                    |                                                                                                                                                                                                            | Applicability Concerns          |            |                    |
|---------------------------|------------------------------------------------------|------------|--------------------|------------------------------------------------------------------------------------------------------------------------------------------------------------------------------------------------------------|---------------------------------|------------|--------------------|
|                           | Patient Selection                                    | Index Test | Reference Standard | Flow And Timing                                                                                                                                                                                            | Patient Selection               | Index Test | Reference Standard |
| Abu-Ghanem (2015) [22]    | High: voluntary participation                        | Low        | Low                | Low                                                                                                                                                                                                        | High: elderly participants only | Low        | Low                |
| Khoza-Shangase (2013)[25] | High: quota sampling                                 | Low        | Low                | Low                                                                                                                                                                                                        | Low                             | Low        | Low                |
| Peer (2015)[26]           | Low                                                  | Low        | Low                | High: excluded some results from analysis. Conventional PTA performed within a two-week period prior to index test. Risk that hearing levels may have significantly changed when index test was performed. | Low                             | Low        | Low                |
| Sduzek (2012)[19]         | Unclear: details of method of selection not reported | Low        | Low                | Low                                                                                                                                                                                                        | Low                             | Low        | Low                |



|                                                                                                                                                              |                                                          |                                                                    |     |     |     |     |     |
|--------------------------------------------------------------------------------------------------------------------------------------------------------------|----------------------------------------------------------|--------------------------------------------------------------------|-----|-----|-----|-----|-----|
| Swanepoel (2014)<br>[27]                                                                                                                                     | High: convenience sampling                               | Low                                                                | Low | Low | Low | Low | Low |
| Richards (2015)[23]                                                                                                                                          | High: recruitment on specific days, convenience sampling | High: reference standard performed prior to index and not blinded. | Low | Low | Low | Low | Low |
| High = high risk of bias/high concern of applicability, Low= low risk of bias/low concern of applicability, Unclear=inadequate information to make judgement |                                                          |                                                                    |     |     |     |     |     |
