# Supplementary material for: Validated Smartphone-Based Apps for Ear and Hearing Assessments: A Review
Source: JMIR Rehabil Assist Technol. 2016 Dec 23;3(2):e13. doi: 10.2196/rehab.6074 (PMC5454564; doi:10.2196/rehab.6074)
Supplement: Supplementary file 3 [file rehab_v3i2e13_app3.pdf]

| Study author, year              | Setting                                   | Study design    | Participants, Sampling method                                                                              | Device(s) and transducers used, administration method                                                                                              | Reference/ gold standard                                                                        | Outcomes                                                                                                                                        | Definition of hearing loss used for sensitivity/specificity analysis | Test frequencies (kHz) | Calibration performed                                                                                                                    | Result summary                                                                                                                                                                                                            |
|---------------------------------|-------------------------------------------|-----------------|------------------------------------------------------------------------------------------------------------|----------------------------------------------------------------------------------------------------------------------------------------------------|-------------------------------------------------------------------------------------------------|-------------------------------------------------------------------------------------------------------------------------------------------------|----------------------------------------------------------------------|------------------------|------------------------------------------------------------------------------------------------------------------------------------------|---------------------------------------------------------------------------------------------------------------------------------------------------------------------------------------------------------------------------|
| <b>Studies validating uHear</b> |                                           |                 |                                                                                                            |                                                                                                                                                    |                                                                                                 |                                                                                                                                                 |                                                                      |                        |                                                                                                                                          |                                                                                                                                                                                                                           |
| Abu-Ghanem et al. (2015)        | Retirement facility.<br><br>Israel, urban | Within subjects | N=26<br>Age: 65-94 years; mean 84.4 years<br>Gender: 31% (M) 69% (F)<br>Sampling: Voluntary participation. | Single iPhone 4S<br><br>Sennheiser CX300 headphones in three available sizes with replaceable rubber covers<br><br>Self-administered in quiet room | Conventional PTA on portable audiometer in quiet room (ambient noise 41-42dBA) with audiologist | Sensitivity/ Specificity; Mean difference in thresholds; Pearson's correlation coefficient (for validity of uHear questionnaire); Test duration | PTAv>40dB HL at 500, 1000, 2000 and 4000Hz in better ear             | 0.25, 5, 1, 2, 4, 6    | No<br><br>Single device and headphone combination was used to test all participants in order to avoid potential inter-device variability | Sensitivity=100%<br>Specificity=60%<br><br>Mean difference in thresholds varied from 0.38-17.02dB HL greater for uHear depending on the frequency. Difference statistically significant at all frequencies except 2000Hz. |
| Khoza-Shangaze et al. (2013)    | School. South Africa, urban               | Within subjects | N=86<br>Age: 8-10 years; mean 9.0 years<br>Gender: 49% (M) 51% (F)<br>Sampling: Quota                      | Single iPod touch<br><br>Standard earbud headphones<br><br>Administered by audiologist in a quiet room                                             | Conventional PTA in quiet room with audiologist                                                 | Mean difference in thresholds – greater than 10dB was considered a significant shift in thresholds                                              | Hearing level >15dB HL                                               | 0.25, 5, 1, 2, 4, 6, 8 | No<br><br>Single device and headphone combination was used to test all participants in order to avoid potential inter-device variability | Mean difference in thresholds: Varied from 9.2 to 23.4dB HL greater for uHear depending on the frequency (standard deviation 9.4-21.9dB). Differences statistically significant at all frequencies.                       |

**Appendix 3:** Summary of selected peer-reviewed studies included in the review

| Study author, year              | Setting                               | Study design    | Participants, Sampling method                                                                        | Device(s) and transducers used, administration method                                                                                                                                                    | Reference/ gold standard                                | Outcomes                                                                                               | Definition of hearing loss used for sensitivity/specificity analysis | Test frequencies (kHz) | Calibration performed                                                                                                                    | Result summary                                                                                                                                                                                                                                                                                                                                                                                                                                                                                                               |
|---------------------------------|---------------------------------------|-----------------|------------------------------------------------------------------------------------------------------|----------------------------------------------------------------------------------------------------------------------------------------------------------------------------------------------------------|---------------------------------------------------------|--------------------------------------------------------------------------------------------------------|----------------------------------------------------------------------|------------------------|------------------------------------------------------------------------------------------------------------------------------------------|------------------------------------------------------------------------------------------------------------------------------------------------------------------------------------------------------------------------------------------------------------------------------------------------------------------------------------------------------------------------------------------------------------------------------------------------------------------------------------------------------------------------------|
| <b>Studies validating uHear</b> |                                       |                 |                                                                                                      |                                                                                                                                                                                                          |                                                         |                                                                                                        |                                                                      |                        |                                                                                                                                          |                                                                                                                                                                                                                                                                                                                                                                                                                                                                                                                              |
| Peer et al. (2015)              | ENT clinic<br><br>South Africa, urban | Within subjects | N=25 patients<br>Age: 15-80 years; mean 43 years<br>Gender: 52% (M) 48% (F)<br>Sampling: Consecutive | Single iPhone 4<br><br>Standard earbud headphones<br><br>Self-administered in 3 different settings: quiet room, waiting room, soundproof room.<br>Investigator was present to ensure test was completed. | Conventional PTA in soundproof room with an audiologist | Sensitivity/Specificity; Cohen's kappa comparing agreement between thresholds at different frequencies | PTAv>40dB HL at 500, 1000, 2000 and 4000Hz in either ear             | 0.25, 5, 1, 2, 4, 6    | No<br><br>Single device and headphone combination was used to test all participants in order to avoid potential inter-device variability | <b>Waiting room:</b><br>Sensitivity=100%<br>Specificity=64%<br>Cohen's kappa:<br><i>Low frequencies:</i> poor to moderate<br><i>High frequencies:</i> moderate<br><br><b>Quiet room:</b><br>Sensitivity=100%<br>Specificity=74%<br>Cohen's kappa:<br><i>Low frequencies:</i> poor to moderate<br><i>High frequencies:</i> Moderate to good<br><br><b>Soundproof room:</b><br>Sensitivity=100%<br>Specificity=88%<br>Cohen's kappa:<br><i>Low frequencies:</i> Poor to good<br><i>High frequencies:</i> Moderate to very good |

| Study author, year              | Setting                                                       | Study design    | Participants, Sampling method                                                                 | Device(s) and transducers used, administration method                                                                                                                           | Reference/ gold standard                                        | Outcomes                                                                                                         | Definition of hearing loss used for sensitivity/specificity analysis   | Test frequencies (kHz) | Calibration performed                                                                                                                | Result summary                                                                                                                                                                                                                                                                                                                                                                                                                                                              |
|---------------------------------|---------------------------------------------------------------|-----------------|-----------------------------------------------------------------------------------------------|---------------------------------------------------------------------------------------------------------------------------------------------------------------------------------|-----------------------------------------------------------------|------------------------------------------------------------------------------------------------------------------|------------------------------------------------------------------------|------------------------|--------------------------------------------------------------------------------------------------------------------------------------|-----------------------------------------------------------------------------------------------------------------------------------------------------------------------------------------------------------------------------------------------------------------------------------------------------------------------------------------------------------------------------------------------------------------------------------------------------------------------------|
| <b>Studies validating uHear</b> |                                                               |                 |                                                                                               |                                                                                                                                                                                 |                                                                 |                                                                                                                  |                                                                        |                        |                                                                                                                                      |                                                                                                                                                                                                                                                                                                                                                                                                                                                                             |
| Szudek et al. (2012)            | Single otology practice within hospital.<br><br>Canada, urban | Within subjects | N=100<br>Age: 20-91 years; mean 46 years<br>Gender: 33% (M) 67% (F)<br>Sampling: Not reported | Single iPod touch<br><br>Standard earbud headphones<br><br>Self-administered in soundproof room and quiet room (ambient noise <50dBA) under supervision of clinician/researcher | Conventional PTA in a soundproof room with a single audiologist | Sensitivity/ Specificity; Mean difference in thresholds – within 10dB considered normal variation; Test duration | PTAv>40dB HL at 500, 1000, 2000 and 4000Hz<br>Ear was unit of analysis | 0.25, 5, 1, 2, 4, 6    | No<br>Single device and headphone combination was used to test all participants in order to avoid potential inter-device variability | <b>Quiet room:</b><br>Sensitivity=98% (95%CI=89-100)<br>Specificity=82% (95%CI=75-88)<br><br>Mean difference in thresholds: 14dB HL greater with uHear for all ears compared to PTA, 6dB HL for ears with a hearing loss (p<0.001)<br><br><b>Soundproof room:</b><br>Sensitivity=100% (95%CI=92-100)<br>Specificity=90% (95%CI=83-94)<br><br>Mean difference in thresholds: 8dB greater with uHear for all ears compared to PTA, 4dB for ears with a hearing loss (p<0.001) |

| Study author, year                    | Setting                                   | Study design    | Participants, Sampling method                                                                 | Device(s) and transducers used, administration method                                                                                                                                              | Reference/ gold standard                             | Outcomes                                                                                                                                                                            | Definition of hearing loss used for sensitivity/specificity analysis                                           | Test frequencies (kHz)                 | Calibration performed                                                                                                                    | Result summary                                                                                                                                                                                |
|---------------------------------------|-------------------------------------------|-----------------|-----------------------------------------------------------------------------------------------|----------------------------------------------------------------------------------------------------------------------------------------------------------------------------------------------------|------------------------------------------------------|-------------------------------------------------------------------------------------------------------------------------------------------------------------------------------------|----------------------------------------------------------------------------------------------------------------|----------------------------------------|------------------------------------------------------------------------------------------------------------------------------------------|-----------------------------------------------------------------------------------------------------------------------------------------------------------------------------------------------|
| <b>Studies validating uHear</b>       |                                           |                 |                                                                                               |                                                                                                                                                                                                    |                                                      |                                                                                                                                                                                     |                                                                                                                |                                        |                                                                                                                                          |                                                                                                                                                                                               |
| Handzel et al. (2013)                 | Emergency department<br><br>Israel, urban | Within subjects | N=32<br>Age: 20-82 years; mean 51.4 years<br>Gender: 75% (M) 25% (F)<br>Sampling: Consecutive | Single iPod touch<br><br>Creative EP 630 earbud speakers with replaceable rubber covers.<br><br>Self-administered in a quiet room (ambient noise varied between 41-42dBA) supervised by researcher | Conventional PTA in soundproof room                  | Sensitivity/Specificity                                                                                                                                                             | Sudden sensorineural hearing loss: hearing loss of 2 or more hearing grades in 3 consecutive test frequencies. | 0.25, 5, 1, 2, 4, 6                    | No<br><br>Single device and headphone combination was used to test all participants in order to avoid potential inter-device variability | Sensitivity=76% (53-92)<br>Specificity=91% (59-99)                                                                                                                                            |
| <b>Studies validating Ear Trumpet</b> |                                           |                 |                                                                                               |                                                                                                                                                                                                    |                                                      |                                                                                                                                                                                     |                                                                                                                |                                        |                                                                                                                                          |                                                                                                                                                                                               |
| Foulad et al. (2013) <sup>a</sup>     | Medical<br><br>USA, urban                 | Within subjects | N=42<br>Age: 20-85 years; mean 58 years<br>Gender: 55% (M) 45% (F)<br>Sampling: Consecutive   | Either an iPhone or iPod (multiple devices used)<br><br>Standard earbud headphones<br><br>Self-administered in soundproof room and quiet room                                                      | Conventional pure tone audiometry in soundproof room | Percent of thresholds falling within 0-5dB, 0-10dB and 0-20dB of standard audiometry; Paired threshold differences; iOS device compatibility (how the output varies across devices) | None given                                                                                                     | 0.25, 0.5, 0.75, 1, 1.5, 2, 3, 4, 6, 8 | iOS based hearing test was designed and calibrated with Apple's earbuds connected to a soundmeter through 1" tube simulating ear canal   | Quiet room: Percent of thresholds falling with 10dB of standard audiometry =94% (87-100)<br><br>Soundproof room: Percent of thresholds falling with 10dB of standard audiometry =96% (91-100) |

| Study author, year                           | Setting                                | Study design    | Participants, Sampling method                                                                      | Device(s) and transducers used, administration method                                                                                                                                  | Reference/ gold standard                        | Outcomes                                                                                                                                             | Definition of hearing loss used for sensitivity/specificity analysis                                   | Test frequencies (kHz) | Calibration performed                                                                                                                                                                                    | Result summary                                                                |
|----------------------------------------------|----------------------------------------|-----------------|----------------------------------------------------------------------------------------------------|----------------------------------------------------------------------------------------------------------------------------------------------------------------------------------------|-------------------------------------------------|------------------------------------------------------------------------------------------------------------------------------------------------------|--------------------------------------------------------------------------------------------------------|------------------------|----------------------------------------------------------------------------------------------------------------------------------------------------------------------------------------------------------|-------------------------------------------------------------------------------|
| <b>Studies validating shoeBOX audiometry</b> |                                        |                 |                                                                                                    |                                                                                                                                                                                        |                                                 |                                                                                                                                                      |                                                                                                        |                        |                                                                                                                                                                                                          |                                                                               |
| Yeung et al. (2013) <sup>a</sup>             | Audiology clinic.<br><br>Canada, urban | Within subjects | N=70 children<br>Age: 3-13 years; mean 5.2 years<br>Gender: Not described<br>Sampling: Consecutive | Single iPad<br><br>Calibrated TDH-39 headphones<br><br>Soundproof room with two audiologists                                                                                           | Traditional play audiometry in soundproof room  | Sensitivity/ Specificity; Repeated measures analysis (model); Participant performance – including time to completion, feedback from the audiologists | Threshold greater than 25dB HL in any of 4 test frequencies (500, 1000, 2000 and 4000Hz)               | 0.5, 1, 2, 4           | Professionally calibrated by Genie Audio Inc to ANSI S3.6-2004 standards.                                                                                                                                | Sensitivity =93.3% (95%CI=71.7-99.6)<br>Specificity =94.5% (95%CI=88.6-96.3)  |
| Yeung et al. (2015) <sup>a</sup>             | Audiology clinic.<br><br>Canada, urban | Within subjects | N=79<br>Age: 5-17 years; mean 9.5 years<br>Gender: Not described<br>Sampling: Consecutive          | Single iPad 2<br><br>Apple In Ear Headphones or Apple Earbud Headphones<br><br>Self-administered by child in quiet room supervised by an adult and a communication disorders assistant | Traditional play audiometry in sound proof room | Sensitivity/ Specificity; Receiver Operating Curve (ROC) curve to determine optimum discrimination threshold                                         | Threshold greater than 25dB HL in any of 4 test frequencies, but changed to 30dB HL in analysis stage. | 0.5, 1, 2, 4           | Professionally calibrated by Genie Audio Inc to ANSI S3.6-2004 standards using non-standard RETSPLs derived using the TDH39 headphones as a reference (no standard exists for ear-bud headphones in ANSI | Sensitivity =91.2% (95% CI=78.5-97.6)<br>Specificity =57.8% (95%CI=48.2-62.6) |

|  |  |  |  |  |  |  |  |  |                         |  |
|--|--|--|--|--|--|--|--|--|-------------------------|--|
|  |  |  |  |  |  |  |  |  | S3.6-2010<br>document). |  |
|--|--|--|--|--|--|--|--|--|-------------------------|--|

| Study author, year                   | Setting                            | Study design    | Participants, Sampling method                                                                   | Device(s) and transducers used, administration method                                                                                                                   | Reference/ gold standard                             | Outcomes                                                                                                                                                                                                             | Definition of hearing loss used for sensitivity/specificity analysis | Test frequencies (Hertz) | Calibration performed                                                                                                                                                                  | Result summary                                                                                                                                                                                                                                       |
|--------------------------------------|------------------------------------|-----------------|-------------------------------------------------------------------------------------------------|-------------------------------------------------------------------------------------------------------------------------------------------------------------------------|------------------------------------------------------|----------------------------------------------------------------------------------------------------------------------------------------------------------------------------------------------------------------------|----------------------------------------------------------------------|--------------------------|----------------------------------------------------------------------------------------------------------------------------------------------------------------------------------------|------------------------------------------------------------------------------------------------------------------------------------------------------------------------------------------------------------------------------------------------------|
| <b>Studies validating AudCal</b>     |                                    |                 |                                                                                                 |                                                                                                                                                                         |                                                      |                                                                                                                                                                                                                      |                                                                      |                          |                                                                                                                                                                                        |                                                                                                                                                                                                                                                      |
| Larrosa et al. (2015) <sup>a</sup>   | 9 ENT clinics.<br><br>Spain, urban | Within subjects | N=110<br>Age: 18-91 years; mean 43.9 years<br>Gender: 54% (M) 46% (F)<br>Sampling: Consecutive  | Various apple devices (iPhone 4, 5, 5c, 5s, iPad 2)<br><br>Standard earbud headphones<br><br>Audiologist administered in "minimal ambient noise level sound conditions" | Conventional pure tone audiometry in soundproof room | Cohen's kappa coefficient (agreement between both methods); Threshold compared using: Cronbach's alpha (reliability of application), Intraclass correlation coefficient (concordance), mean difference in thresholds | PTA>20dB HL at 500, 1000, 2000, 4000Hz                               | 0.5, 1, 2, 3, 4, 8       | Calibrated by researchers using iPhone 5 and EarPod (human sensitivity model – manual comparison between audiometer and standard headphones and EarPod headphones coupled with iPhone) | Kappa coefficient = 0.894<br><br>Cronbach's alpha: All cases 0.96 (≥0.80 considered excellent)<br><br>Intraclass correlation coefficient (concordance) All cases 0.93 (≥0.90 considered excellent)<br><br>Mean difference in thresholds: 0.21±6.38dB |
| <b>Studies validating hearScreen</b> |                                    |                 |                                                                                                 |                                                                                                                                                                         |                                                      |                                                                                                                                                                                                                      |                                                                      |                          |                                                                                                                                                                                        |                                                                                                                                                                                                                                                      |
| Swanepoel et al. (2014) <sup>a</sup> | School.<br><br>South Africa, urban | Within subjects | N=162<br>Age: 5.6 – 7.7 years; mean 6.5 years<br>Gender: Not described<br>Sampling: Convenience | Two Samsung Galaxy pocket plus S5301 smartphones<br><br>Sennheiser HD202 supra-aural headphones<br><br>Administered by audiology student in quiet                       | Conventional screening audiometry                    | Agreement between smartphone and conventional screening; Referral rate; Validity of smartphone calibration; Validity of environmental noise                                                                          | Threshold >25dB HL at 1000, 2000, or 4000Hz                          | 1, 2, 4                  | Calibrated professionally coupled to Sennheiser HD202 headphones. Calibration within +/- 3dB of RESPLs                                                                                 | Smartphone and conventional hearing screening methods were in agreement in 97.8% of cases. hearScreen had a referral rate of 4.3% whilst conventional screening 3.7%.                                                                                |

|  |  |  |  |                                        |  |                              |  |  |  |  |
|--|--|--|--|----------------------------------------|--|------------------------------|--|--|--|--|
|  |  |  |  | room.<br>Supervised by<br>audiologist. |  | monitoring;<br>Test duration |  |  |  |  |
|--|--|--|--|----------------------------------------|--|------------------------------|--|--|--|--|

| Study author, year | Setting | Study design | Participants, Sampling method | Device(s) and transducers used, administration method | Reference/ gold standard | Outcomes | Definition of hearing loss used for sensitivity/specificity analysis | Test frequencies (Hertz) | Calibration performed | Result summary |
|--------------------|---------|--------------|-------------------------------|-------------------------------------------------------|--------------------------|----------|----------------------------------------------------------------------|--------------------------|-----------------------|----------------|
|--------------------|---------|--------------|-------------------------------|-------------------------------------------------------|--------------------------|----------|----------------------------------------------------------------------|--------------------------|-----------------------|----------------|

#### Studies validating CellScope

|                               |                                                                     |                    |                                                                                           |                              |                                                      |                                                                                                                                                                                                                                                                                  |     |     |     |                                                                                                                                                                                                                                                                                                                      |
|-------------------------------|---------------------------------------------------------------------|--------------------|-------------------------------------------------------------------------------------------|------------------------------|------------------------------------------------------|----------------------------------------------------------------------------------------------------------------------------------------------------------------------------------------------------------------------------------------------------------------------------------|-----|-----|-----|----------------------------------------------------------------------------------------------------------------------------------------------------------------------------------------------------------------------------------------------------------------------------------------------------------------------|
| Richard<br>s et al.<br>(2015) | Academic<br>paediatric<br>emergency<br>department<br><br>USA, urban | Within<br>subjects | N=51<br>Age: mean 5.1<br>years<br>Gender: 53%<br>(M) 47% (F)<br>Sampling:<br>Convenience. | <b>CellScope</b><br>otoscopy | Traditional<br>otoscopy with<br>camera<br>attachment | Ear<br>examination<br>findings were<br>grouped as<br>normal,<br>abnormal with<br>effusion,<br>abnormal with<br>erythema of<br>TM, abnormal<br>(other not<br>listed),<br>cerumen<br>impaction, and<br>unable to<br>visualise. Inter<br>and intrarater<br>diagnostic<br>agreement. | N/A | N/A | N/A | <i>Intrarater<br/>agreement<br/>resident<br/>physicians:</i> Right<br>ear: k=0.74 (95%<br>CI, 0.58-0.89)<br>Left ear: k=0.74<br>(95% CI, 0.58-<br>0.89)<br><i>Intrarater<br/>agreement<br/>attending<br/>physicians:</i><br>Right ear: k=0.86<br>(95% CI,<br>0.72-0.98)<br>Left ear: k=0.79<br>(95%CI,0.65-<br>0.94) |
|-------------------------------|---------------------------------------------------------------------|--------------------|-------------------------------------------------------------------------------------------|------------------------------|------------------------------------------------------|----------------------------------------------------------------------------------------------------------------------------------------------------------------------------------------------------------------------------------------------------------------------------------|-----|-----|-----|----------------------------------------------------------------------------------------------------------------------------------------------------------------------------------------------------------------------------------------------------------------------------------------------------------------------|

<sup>a</sup>=conflict of interest declared

PTAv=Pure Tone Average

ENT= Ear Nose and Throat

RET SPLs=Reference Equivalent Threshold Sound Pressure Level

ANSI= American National Standards Institute

CI=Confidence Interval

k=Kappa

Hz=Hertz

dB=Decibels
